# Supplementary material for: Effects of thermodynamic ensembles and mineral surfaces on interfacial water structure
Source: Royal Society of Chemistry journal article supplement (doi:10.1039/c2cp22593j), 2011-12-21
Supplement: c2cp22593j.pdf [file c2cp22593j.pdf]

# **Effects of Thermodynamic Ensemble and Mineral Surface on Interfacial Water Structure**

Todd R. Zeitler,\* Jeffery A. Greathouse, and Randall T. Cygan

Supplementary Material

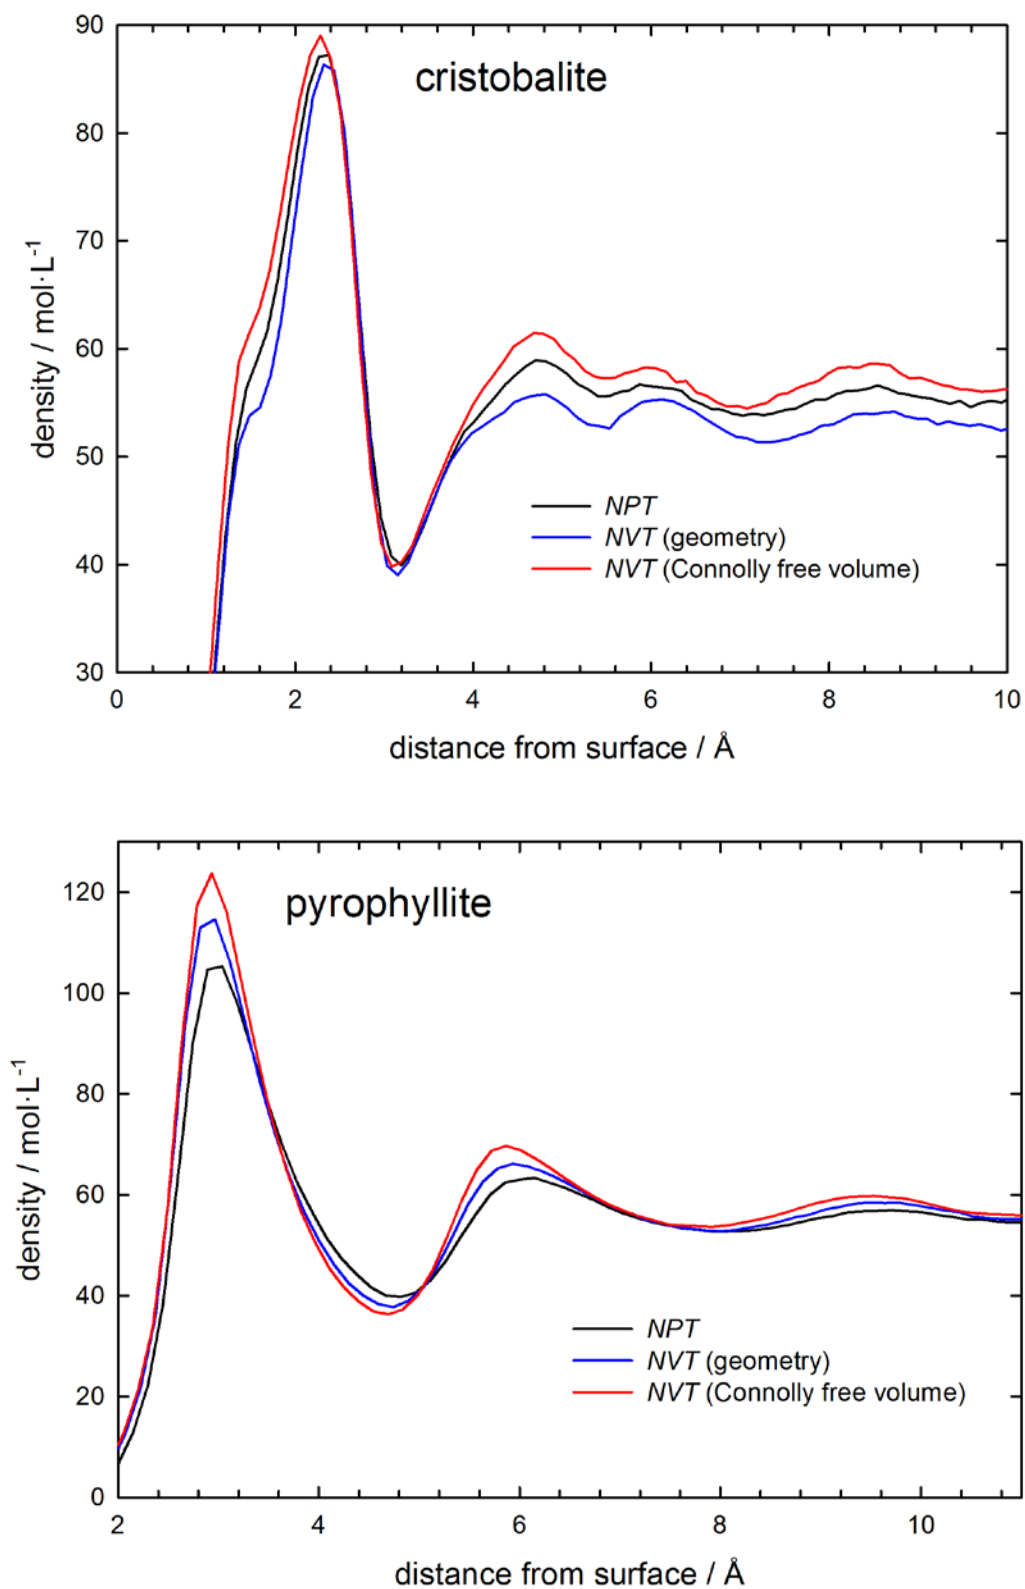

Figure S1. Water oxygen density profiles near the surface of cristobalite (111) (top) and pyrophyllite (001) (bottom) based on  $10^5$  configurations over 10 ns.

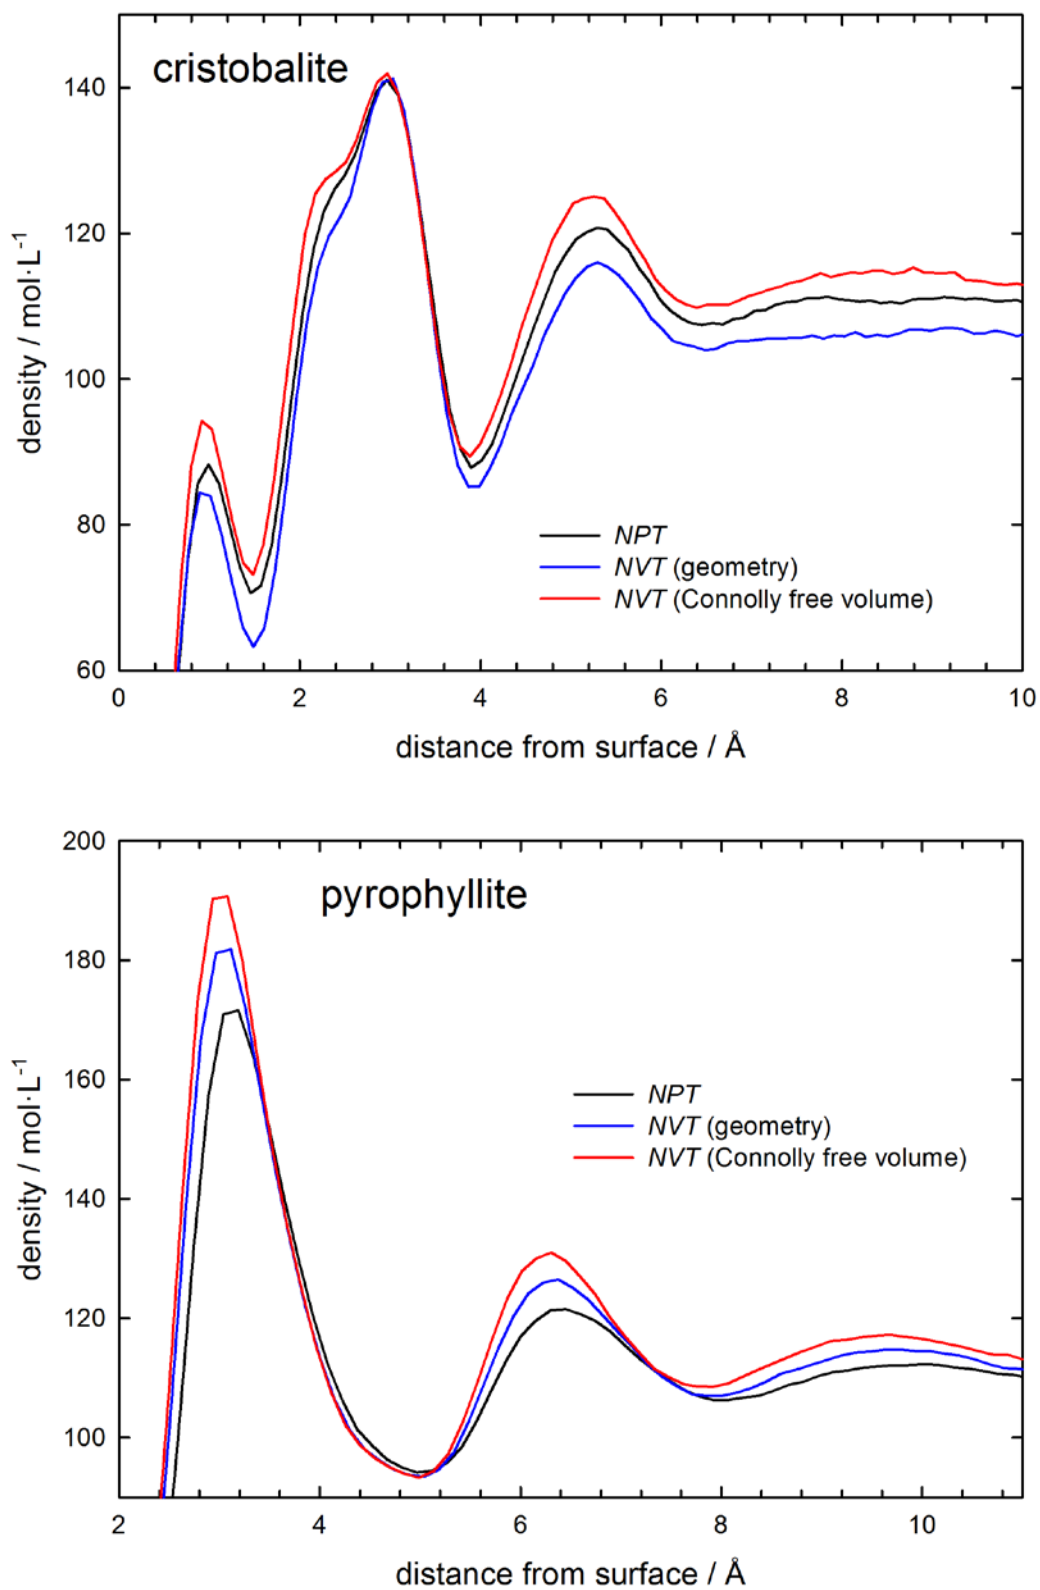

Figure S2. Water hydrogen density profiles near the surface of cristobalite (111) (top) and pyrophyllite (001) (bottom) based on 10<sup>5</sup> configurations over 10 ns.
